1 Calcium nanodomains in spindles

2

3

4 Guolong Mo<sup>1,2\*</sup>, Ruizhen Li<sup>1\*</sup>, Zachary Swider<sup>3</sup>, Yong Tao<sup>1</sup>, Katsuhiko Mikoshiba<sup>4</sup>,

5 William M. Bement<sup>3#</sup> and X. Johné Liu<sup>1,2,5#</sup>

6

7 1, Ottawa Hospital Research Institute, Ottawa Hospital General Campus, 501 Smyth  
8 Road, Ottawa, K1H 8L6. Canada.

9

10 2. Department of Biochemistry, Microbiology and Immunology. University of Ottawa.

11

12 3, Department of Zoology, University of Wisconsin-Madison, 1117 West Johnson Street,  
13 Madison, WI 53706, USA.

14

15 4. Laboratory for Developmental Neurobiology, Brain Science Institute, RIKEN, Saitama  
16 351-0198, Japan.

17

18 5. Department of Obstetrics and Gynaecology, University of Ottawa.

19

20 \*: GM and RL contributed equally to this work.

21

22

23 **#: Correspondence:** Johné Liu

24

Ottawa Hospital Research Institute

25

501 Smyth Road

26

Ottawa, K1H 8L6

27

Canada

28

e-mail: [jliu@ohri.ca](mailto:jliu@ohri.ca)

29

30

Bill Bement

31

Department of Zoology

32

University of Wisconsin-Madison

33

Madison, WI 53706, USA.

34

e-mail: [wmbement@wisc.edu](mailto:wmbement@wisc.edu)

35

36 Summary

37

38 The role of calcium signaling in specific events of animal cell meiosis or mitosis (M-  
39 phase) is a subject of enduring controversy. Early efforts suggested that increases in  
40 intracellular free calcium ( $[Ca^{2+}]_i$ ) promote spindle disassembly<sup>1,2</sup> while subsequent  
41 work suggested that global  $[Ca^{2+}]_i$  increases trigger nuclear envelope breakdown, spindle  
42 assembly, the metaphase-anaphase transition, and cytokinesis<sup>3-6</sup>. However, further  
43 studies led to the conclusion that elevation of  $[Ca^{2+}]_i$  either has no role in these events,  
44 plays a permissive role in these events, or functions as an auxiliary signaling pathway  
45 that supplements other mechanisms<sup>7</sup>. One potential explanation of the controversy is  
46 that specific M-phase events might depend on highly localized increases in  $[Ca^{2+}]_i$ ,  
47 variously referred to as microdomains<sup>8</sup> or nanodomains<sup>9</sup>, as proposed recently<sup>10</sup>. Such  
48 domains are hypothesized to arise from rapid shuttling of calcium between closely  
49 positioned sources and sinks, rendering them potentially difficult to detect with  
50 traditional dyes and largely insensitive to slow chelators such as EGTA<sup>9</sup>. Here a novel  
51 microtubule-binding calcium sensor—TubeCamp--was used to test the hypothesis<sup>10</sup> that  
52 spindles are associated with calcium nanodomains. TubeCamp imaging revealed that  
53 spindles in *Xenopus* eggs, *Xenopus* embryos, and HeLa cells were all associated with  
54 calcium nanodomains at the spindle poles. Calcium nanodomains also formed in spindles  
55 assembled in cell extracts and at the center of monopolar spindles, suggesting that they  
56 are a basic feature of spindle self-assembly. Disruption of calcium nanodomains via  
57 perturbation of inositol-1,4,5-trisphosphate signaling or rapid chelation of  $[Ca^{2+}]_i$  resulted  
58 in spindle disassembly in vivo and vitro. The results demonstrate the existence of

59 spindle-associated calcium nanodomains and indicate that such domains are an essential  
60 and common feature of spindles in vertebrates.  
61

62 To overcome the limitations of soluble calcium reporters, we developed a genetically  
63 encoded probe designed to detect microtubule-proximal increases in  $[Ca^{2+}]_i$ . This probe,  
64 dubbed TubeCamp, comprises the calcium-sensitive derivative of GFP, GCamp3<sup>11</sup>,  
65 fused with the microtubule-binding domain of ensconsin (EMTB)<sup>12</sup>. GCamp  
66 fluorescence emission increases upon calcium binding<sup>11</sup> while fusions of EMTB with  
67 fluorescent proteins have been used in mammalian<sup>13</sup>, amphibian<sup>14,15</sup> and invertebrate<sup>14</sup>  
68 cells to label microtubules. To determine whether TubeCamp reports on microtubule-  
69 proximal elevated  $[Ca^{2+}]_i$ , TubeCamp and R-Geco, a calcium-sensitive reporter protein<sup>16</sup>  
70 were expressed in *Xenopus* oocytes which were then wounded to elicit a local  $[Ca^{2+}]_i$   
71 increase and microtubule reorganization<sup>17</sup>. Before wounding, the oocyte cortex  
72 displayed low levels of both R-Geco and TubeCamp fluorescence (Fig 1A); immediately  
73 after wounding, both R-Geco and TubeCamp fluorescence increased sharply in a circular  
74 region around the wound (Fig. 1A). While the global pattern of TubeCamp fluorescence  
75 paralleled that of R-Geco in space and time (Fig. 1A, A'), the TubeCamp signal was  
76 distinctly filamentous. That the filamentous structures detected by TubeCamp were  
77 microtubules was determined by wounding experiments using TubeCamp in combination  
78 with 2X-mCh-EMTB (mCh-EMTB; Fig. 1B): mCh-EMTB labeled all cortical  
79 microtubules before and after wounding; TubeCamp fluorescence was sharply elevated  
80 after wounding only on microtubules within 10  $\mu$ m of the wound (Fig. 1B, B; and C).  
81 TubeCamp also reported on microtubule-proximal increases in  $[Ca^{2+}]_i$  in somatic cells in  
82 developing embryos, as shown by wounding one epithelial cell, which triggers and  
83 increase in  $[Ca^{2+}]_i$  in neighboring epithelial cells (Supplemental Fig. 1; <sup>18</sup>).  
84

85 To determine whether *Xenopus* egg meiotic spindles are dependent on calcium  
86 nanodomains<sup>10</sup>, TubeCamp was co-expressed with mCh-EMTB (Fig. 2A) or rhodamine-  
87 tubulin (not shown). While cortical TubeCamp signal remained low for most of meiosis,  
88 in prometaphase TubeCamp fluorescence began to rise at the spindle pole closest to the  
89 cortex (Fig. 2A). As the spindle became bipolar, TubeCamp fluorescence was evident at  
90 both poles and much more concentrated there than mCh-EMTB (Fig. 2A). In addition,  
91 interpolar TubeCamp fluorescence was observed that, again, clearly differed from that of  
92 total microtubules. Interpolar TubeCamp fluorescence disappeared prior to metaphase,  
93 while the polar signal was maintained until after anaphase (Fig. 2A) when it disappeared  
94 (not shown) until meiosis II during which it reappeared at the poles (Supp. Fig. 2). That  
95 TubeCamp responds to calcium in the oocytes was demonstrated by the dramatic increase  
96 of TubeCamp signal at metaphase II spindle (Supp. Fig. 2) within minutes of inducing the  
97 fertilization-specific cortical calcium wave<sup>10,19</sup>.

98  
99 To further substantiate the presence of spindle-based Ca<sup>2+</sup> transients, we imaged oocytes  
100 using a mobile Ca<sup>2+</sup> indicator, Oregon green 488 BAPTA-2 (OG-2). Consistent with the  
101 results obtained with TubeCamp, OG-2 signal significantly increased at the spindle  
102 assembly site in time course similar to that shown by TubeCamp (Supp. Fig. 3; Movie 1).  
103 In contrast to the results obtained with TubeCamp, OG-2 revealed only diffuse-spindle-  
104 associated signal, likely due to its relative mobility.

105  
106 The spindle pole localization of TubeCamp signal was also evident in oocytes induced to  
107 form monopolar spindles in the presence of the kinesin 5 inhibitor S-trityl L-cysteine

108 (STLC)<sup>20</sup>. In these oocytes, TubeCamp signal concentrated at the ring-shaped monopole  
109 (Fig. 2B, top row). To further confirm the specificity of the TubeCamp probe, oocytes  
110 with monopolar spindles were subject to uncaging of IP<sub>3</sub><sup>21</sup>. This manipulation resulted  
111 in an immediate and dramatic increase of TubeCamp signal but not that of mCh-EMTB  
112 signal (Fig. 2B).

113

114 To determine whether calcium nanodomains associate with mitotic spindles, *Xenopus*  
115 gastrula expressing TubeCamp and mCherry-Histone were analyzed. As in meiotic  
116 spindles, TubeCamp signal was elevated at each of the spindle poles and along a  
117 microtubule or bundle of microtubules running from pole to pole (Fig. 2C; Movie 2).

118

119 To extend this discovery to mammalian mitosis, we expressed TubeCamp with mCh-  
120 EMTB (Fig. 2D) or mCh- $\alpha$ -tubulin (Supp. Fig. 4) in HeLa cells. As in *Xenopus* meiotic  
121 and mitotic spindles, TubeCamp signal was observed at the two spindle poles from  
122 prometaphase to cytokinesis (Fig. 2D). Following cytokinesis, TubeCamp signal  
123 persisted around the chromosomes where individual TubeCamp foci were observed in the  
124 two daughter cells (Fig. 2D).

125

126 Spindle calcium nanodomains might arise as a specific consequence of the normal three  
127 dimensional organization of the cell or they might develop as a basic feature of spindle  
128 self-organization<sup>22</sup>. To distinguish between these possibilities, a micro-aspiration  
129 approach was devised that allowed spindle assembly in cell free extracts obtained from  
130 single *Xenopus* oocytes (Supp. Fig. 5). To examine Ca<sup>2+</sup> nanodomains in this system, we

131 added demembrated sperm to cytoplasm from GVBD oocytes expressing TubeCamp  
132 and mCh-EMTB. No distinct TubeCamp signal was observed at the early stage when an  
133 aster was seen (Fig. 3, 00:00). However, TubeCamp signal concentrated at the spindle  
134 poles as the spindle became bipolar (Fig. 3, Movie 3). Thus, calcium nanodomains are a  
135 basic feature of spindle self-organization.

136

137 To test the significance of the spindle nanodomains, oocytes treated with STLC (to  
138 induce monopolar spindles) and expressing TubeCamp and rhodamine tubulin were  
139 subjected to UV-uncaging of diazo-2, a caged BAPTA analogue<sup>10,23</sup>. Uncaging of  
140 diazo-2 resulted in dissipation of the spindle nanodomains and, in parallel, loss of spindle  
141 microtubules (Fig 4A; Movie 4).

142

143 As a complementary approach, meiotic spindle reformation after colcemid treatment was  
144 examined in the presence of EGTA or diazo-2. Spindles were first disassembled by  
145 colcemid treatment and the colcemid was then inactivated by UV exposure<sup>15</sup>. In the  
146 presence of EGTA, the slow chelator, meiotic spindles reformed (Fig. 4B, EGTA, 00:00-  
147 00:14; Movie 5) but in the presence of diazo-2 they did not (Fig. 4B, diazo-2, 00:00-  
148 00:20; Movie 5), because UV photolysis also released the fast chelator BAPTA<sup>10</sup> in  
149 addition to inactivating colcemid<sup>15</sup> in the oocytes. As a further test of nanodomains,  
150 spindles were assembled using the microaspiration approach and then treated with either  
151 EGTA or dibromo-BAPTA<sup>10</sup>. While spindles exposed to EGTA persisted for more than  
152 an hour, those exposed to BAPTA disassembled within minutes (Fig. 4C), as we have  
153 shown in intact oocytes<sup>10</sup>.

154

155 To determine whether calcium stores are associated with spindles, immunofluorescence  
156 was used to monitor the location of the inositol-1,4,5-trisphosphate (IP<sub>3</sub>) receptor.  
157 Strikingly, the IP<sub>3</sub> receptor was concentrated at the poles of normal meiotic spindles,  
158 monoastral spindles and HeLa cell spindles (Fig. 4D). Further, both the IP<sub>3</sub> receptor and  
159 endoplasmic reticulum (ER) were concentrated at the poles of spindles assembled in  
160 extracts (Fig. 4E). As a functional test of these potential calcium stores, heparin, an IP<sub>3</sub>  
161 receptor antagonist (5) was employed. Heparin caused rapid loss of spindle microtubules  
162 both in intact oocytes (Fig. 4F) and in extracts (4G).

163

164 In summary, the results provide the first direct visualization of calcium nanodomains in  
165 M-phase cells, show that such nanodomains are essential for spindle assembly and  
166 maintenance, and indicate that they are likely dependent on IP<sub>3</sub>-gated calcium stores.  
167 The results also show that in addition to forming at poles, the nanodomains are associated  
168 with a population of microtubules running from pole-to-pole that, to the best of our  
169 knowledge, has not been described before. More generally, the strategy employed here  
170 may be broadly useful for identifying other potential M-phase calcium micro or  
171 nanodomains via fusion of GCamp (or related calcium reporters) with nuclear envelope  
172 proteins, histone, or other proteins localized to sites of hypothesized calcium increase.

173



174  
175  
176  
177  
178  
  
179  
180  
181  
  
182  
183  
184  
  
185  
186  
187  
  
188  
189  
190  
  
191  
192  
  
193  
194  
195  
  
196  
197  
  
198  
199  
  
200  
201  
202  
  
203  
204  
  
205  
206  
207

## Reference List

1. Salmon, E.D. & Wolniak, S.M. Taxol stabilization of mitotic spindle microtubules: analysis using calcium-induced depolymerization. *Cell Motil.* **4**, 155-167 (1984).
2. Pratt, M.M., Otter, T., & Salmon, E.D. Dynein-like Mg<sup>2+</sup>-ATPase in mitotic spindles isolated from sea urchin embryos (*Strongylocentrotus droebachiensis*). *J. Cell Biol.* **86**, 738-745 (1980).
3. Poenie, M., Alderton, J., Steinhardt, R., & Tsien, R. Calcium rises abruptly and briefly throughout the cell at the onset of anaphase. *Science* **233**, 886-889 (1986).
4. Steinhardt, R.A. & Alderton, J. Intracellular free calcium rise triggers nuclear envelope breakdown in the sea urchin embryo. *Nature* **332**, 364-366 (1988).
5. Groigno, L. & Whitaker, M. An anaphase calcium signal controls chromosome disjunction in early sea urchin embryos. *Cell* **92**, 193-204 (1998).
6. Sun, L. & Machaca, K. Ca<sup>2+</sup>(cyt) negatively regulates the initiation of oocyte maturation. *J. Cell Biol.* **165**, 63-75 (2004).
7. Tombes, R.M. & Borisy, G.G. Intracellular free calcium and mitosis in mammalian cells: anaphase onset is calcium modulated, but is not triggered by a brief transient. *J. Cell Biol.* **109**, 627-636 (1989).
8. Berridge, M.J. Calcium microdomains: organization and function. *Cell Calcium* **40**, 405-412 (2006).
9. Wang, L.Y. & Augustine, G.J. Presynaptic nanodomains: a tale of two synapses. *Front Cell Neurosci.* **8**, 455 (2014).
10. Li, R., Leblanc, J., He, K., & Liu, X.J. Spindle function in *Xenopus* oocytes involves possible nanodomain calcium signaling. *Mol. Biol. Cell* **27**, 3273-3283 (2016).
11. Tian, L. *et al.* Imaging neural activity in worms, flies and mice with improved GCaMP calcium indicators. *Nat. Methods* **6**, 875-881 (2009).
12. Faire, K. *et al.* E-MAP-115 (ensconsin) associates dynamically with microtubules in vivo and is not a physiological modulator of microtubule dynamics. *J. Cell Sci.* **112 (Pt 23)**, 4243-4255 (1999).

- 208 13. Vasileiou,T, Foresti,D, Bayram,A, Poulidakos,D, & Ferrari,A. Toward  
209 Contactless Biology: Acoustophoretic DNA Transfection. *Sci. Rep.* **6**, 20023  
210 (2016).
- 211 14. von Dassow G., Verbrugghe,K.J., Miller,A.L., Sider,J.R., & Bement,W.M.  
212 Action at a distance during cytokinesis. *J. Cell Biol.* **187**, 831-845 (2009).
- 213 15. Shao,H., Li,R., Ma,C., Chen,E., & Liu,X.J. Xenopus oocyte meiosis lacks  
214 spindle assembly checkpoint control. *J. Cell Biol.* **201**, 191-200 (2013).
- 215 16. Zhao,Y. *et al.* An expanded palette of genetically encoded Ca(2)(+)   
216 indicators. *Science* **333**, 1888-1891 (2011).
- 217 17. Mandato,C.A. & Bement,W.M. Actomyosin transports microtubules  
218 and microtubules control actomyosin recruitment during Xenopus oocyte  
219 wound healing. *Curr. Biol.* **13**, 1096-1105 (2003).
- 220 18. Clark,A.G. *et al.* Integration of single and multicellular wound  
221 responses. *Curr. Biol.* **19**, 1389-1395 (2009).
- 222 19. Busa,W.B. & Nuccitelli,R. An elevated free cytosolic Ca<sup>2+</sup> wave follows  
223 fertilization in eggs of the frog, *Xenopus laevis*. *J. Cell Biol.* **100**, 1325-1329  
224 (1985).
- 225 20. Skoufias,D.A. *et al.* S-trityl-L-cysteine is a reversible, tight binding  
226 inhibitor of the human kinesin Eg5 that specifically blocks mitotic  
227 progression. *J. Biol. Chem.* **281**, 17559-17569 (2006).
- 228 21. Dargan,S.L. & Parker,I. Buffer kinetics shape the spatiotemporal  
229 patterns of IP<sub>3</sub>-evoked Ca<sup>2+</sup> signals. *J. Physiol* **553**, 775-788 (2003).
- 230 22. Heald,R. *et al.* Self-organization of microtubules into bipolar spindles  
231 around artificial chromosomes in *Xenopus* egg extracts. *Nature* **382**, 420-  
232 425 (1996).
- 233 23. Mulligan,I.P. & Ashley,C.C. Rapid relaxation of single frog skeletal  
234 muscle fibres following laser flash photolysis of the caged calcium chelator,  
235 diazo-2. *FEBS Lett.* **255**, 196-200 (1989).
- 236 24. Kume,S. *et al.* The *Xenopus* IP<sub>3</sub> receptor: structure, function, and  
237 localization in oocytes and eggs. *Cell* **73**, 555-570 (1993).
- 238 25. Ma,C. *et al.* Cdc42 activation couples spindle positioning to first polar  
239 body formation in oocyte maturation. *Curr. Biol.* **16**, 214-220 (2006).

- 240 26. Turner,D.L. & Weintraub,H. Expression of *achaete-scute homology 3* in  
241 *Xenopus* embryos converts ectodermal cells to a neural fate. *Genes Dev.* **8**,  
242 1434-1447 (1994).
- 243 27. Liu,X.S. & Liu,X.J. Oocyte isolation and enucleation. *Methods Mol. Biol.*  
244 **322**, 31-41 (2006).
- 245 28. Sheng,Y. *et al.* A serotonin receptor antagonist induces oocyte  
246 maturation in both frogs and mice: evidence that the same G protein-  
247 coupled receptor is responsible for maintaining meiosis arrest in both  
248 species. *J. Cell Physiol* **202**, 777-786 (2005).
- 249 29. Zhang,X. *et al.* Polar Body Emission Requires a RhoA Contractile Ring  
250 and Cdc42-Mediated Membrane Protrusion. *Dev. Cell* **15**, 386-400 (2008).
- 251 30. Leblanc,J. *et al.* The Small GTPase Cdc42 Promotes Membrane  
252 Protrusion during Polar Body Emission via ARP2-Nucleated Actin  
253 Polymerization. *Mol. Hum. Reprod.* **17**, 305-316 (2011).
- 254 31. Shao,H. *et al.* Aurora B regulates spindle bipolarity in meiosis in  
255 vertebrate oocytes. *Cell Cycle* **11**, 2672-2680 (2012).
- 256 32. Lohka,M.J. & Masui,Y. Formation in vitro of sperm pronuclei and  
257 mitotic chromosomes induced by amphibian ooplasmic components.  
258 *Science* **220**, 719-721 (1983).
- 259
- 260 33. Murray,A.W. Cell cycle extracts. *Methods Cell Biol.* **36**, 581-605 (1991).  
261  
262  
263

264 Figure 1. TubeCamp specifically reports on microtubule-proximal  $[Ca^{2+}]_i$ .

265

266 **A.** Still frames from confocal movie of wounded *Xenopus* oocyte showing total  
267 intracellular free calcium (revealed by RGECO; red) and microtubule-proximal  
268 intracellular free calcium (revealed by TubeCamp [TubeCamp]; green). Time in  
269 min:sec; sample wounded at 0 sec. **A'**. Fluorescence intensity plots of regions  
270 indicated as 1 and 2 in first panel in A with 1 (top plot) distal to the wound and 2  
271 (bottom plot) proximal to the wound. The temporal patterns of elevated  $[Ca^{2+}]_i$   
272 (RGECO; red) and TC (green) closely parallel each other.

273 **B.** Still frames from confocal movie of wounded *Xenopus* oocyte showing total  
274 microtubules (revealed by mCh-EMTB; red) and microtubule-proximal  $[Ca^{2+}]_i$   
275 (TubeCamp; green). Time in min:sec; sample wounded at 0 sec. Prior to  
276 wounding (-00:04) cortical microtubules are labeled with mCh-EMTB but not  
277 TubeCamp. Shortly after wounding (00:04) microtubules within  $\sim 20\mu\text{m}$  of the  
278 wound acquire green fluorescence; this fluorescence disappears as wound heals. **B'**.  
279 Montage showing enlargement of area boxed in first frame of B at 4s intervals.  
280 Wounding occurs between 3<sup>rd</sup> and 4<sup>th</sup> panel and is accompanied by local,  
281 microtubule-associated increase in green (TubeCamp) but not red (mCh-EMTB)  
282 fluorescence. **C.** Quantification of relative mCh-EMTB and TubeCamp  
283 fluorescence on microtubules before and after wounding and within 10  $\mu\text{m}$  or  
284 farther than 30  $\mu\text{m}$  from wound. Microtubules within 10  $\mu\text{m}$  of wound undergo a  
285 significant increase in TubeCamp but not mCh-EMTB fluorescence. Results are  
286 mean  $\pm$  SD; \* indicates  $p < 0.0001$ ;  $n=11$ .

287 Figure 2. TubeCamp signal in meiotic and mitotic cells

288

289 A. 3D rendering of confocal z stacks of *Xenopus* oocytes expressing TubeCamp and  
290 mCh-EMTB at the indicated stage of oocyte maturation. Time in hr:min after  
291 GVBD, TubeCamp signal is focused at spindle poles and along distinct bundle of  
292 inter polar microtubules (arrow). All except the left column (00:45) are from the  
293 same oocyte.

294 B. Live confocal images of monopolar spindle before (top row) and immediately  
295 after (bottom row) UV uncaging of IP<sub>3</sub>; corresponding fluorescence intensity line  
296 scans on right. TubeCamp (TC) fluorescence, but not mCh-EMTB (mE)  
297 fluorescence, significantly increased upon uncaging (graph; p<0.0001; n=9).  
298 Schematic depicts the locations of a bipolar spindle (those shown in A) or a  
299 monopolar spindle (here) in intact oocytes (green: microtubules; red:  
300 chromosomes).

301 C. Live confocal of *Xenopus* neurula epithelial cells coexpressing TubeCamp (green)  
302 and mCherry-H2B (magenta). TubeCamp signal is concentrated along the spindle  
303 axis and as discrete foci at the poles (yellow arrows). Non-spindle associated  
304 signal (seen in both channels) is the result of yolk autofluorescence. Time is in  
305 min:sec (Movie 2).

306 D. Confocal images of HeLa cells in interphase (arrow: centrosome), and the various  
307 stages of mitosis. Images of the four bottom rows are acquired from the same  
308 cell. Time (hr:min) is from the beginning of imaging of this cell. Spindle is tilted  
309 in cytokinesis image, thus only one pole is visible. TubeCamp signal is

310 concentrated at the spindle poles during mitosis and near decondensing  
311 chromosomes shortly after cytokinesis. Scale bars: 5 $\mu$ m.

312

313 Figure 3. TubeCamp signal during spindle assembly in cell extracts

314

315 Confocal time series of a bipolar spindle in extract of GVBD oocyte  
316 expressing TubeCamp and mCh-EMTB. Time (hr:min) is from the beginning  
317 of imaging. TubeCamp signal is concentrated at spindle poles. Individual  
318 TubeCamp nanodomains became visible after anaphase (Movie 3).

319

320 Figure 4. Calcium nanodomains are required for spindle formation and stability

321

322 A. Confocal images of monopolar spindles subjected to uncaging of diazo-2 (caged  
323 BAPTA). Top: following uncaging by UV exposure, both TubeCamp signal and  
324 microtubules disappear; Bottom, in control samples exposed to UV but not  
325 injected with diazo-2, TubeCamp signal and microtubules persist (Movie 4). The  
326 graph summarizes relative fluorescence (means $\pm$ SEM; green and red represent  
327 TubeCamp and rho-tubulin respectively) at the indicated time points from 9  
328 oocytes in each of control and diazo-2 groups. Purple strip depicts UV exposure  
329 which slightly photobleached TubeCamp.

330 B. Confocal images of normal meiotic spindles allowed to recover from microtubule  
331 depolymerization. DNA labeled with GFP-Histone H2B (H2B) and microtubules  
332 with rhodamine tubulin. Top: following inactivation of colcemid in the presence

333 of EGTA, the spindle reforms. Bottom: following inactivation of colcemid in the  
334 presence of BAPTA (simultaneously photolyzed from diazo-2), the spindle does  
335 not reform (Movie 5).

336 C. Confocal images of metaphase spindles formed in extracts treated with EGTA  
337 (2.5 mM) or dibromo-BAPTA (2.5 mM). DNA labeled with mCh-H2B;  
338 microtubules labeled with GFP-EMTB. Dibromo-BAPTA, but not EGTA, causes  
339 spindle dissolution.

340 D. Immunofluorescence analysis of IP<sub>3</sub> receptor distribution in normal meiotic  
341 spindles (top row), monopolar spindles (middle row) or HeLa cells (bottom row).  
342 Receptor is particularly concentrated at spindle poles.

343 E. Left: Distribution of eGFP-IP<sub>3</sub> receptor (green), microtubules (mCh-EMTB; red)  
344 and DNA (Hoechst, blue) in extract-assembled spindle. Arrows: spindle poles.  
345 Right: Distribution of ER (Sf-GFP-ER; green) and microtubules (mCh-EMTB;  
346 red) in extract assembled spindle.

347 F. Meiotic spindle in oocyte before (00:00) or 15 (00:15) or 20 (00:20) min after  
348 microinjection with heparin (200µg/mL). Microtubules labeled with GFP-EMTB  
349 (green); DNA with mCh-H2B (red). Heparin results in dissolution of the spindle.  
350 Time in hr:min.

351 G. Control and heparin-treated (200µg/mL) extract spindles; microtubules labeled  
352 with GFP-EMTB (green); DNA labeled with mCh-H2B (red). Heparin causes  
353 dissolution of the spindle. Time in hr:min.

354

355 Acknowledgement

356

357 We thank Dr. Chloë van Oostende-Triplet and Ms. Skye McBride of University of  
358 Ottawa Image Core for advice and assistance during this study. We thank Drs. Yixian  
359 Zheng and Rebecca Heald for advice on *Xenopus* egg extract preparation, and Dr. Wayne  
360 SR Chen for discussion. This work was supported by a research grant from Canadian  
361 Institute of Health Research (MOP 89973) to XJL and an NIH grant (GM52932) to  
362 WMB. GM is a recipient of a scholarship from China Scholarship Council, and a  
363 Designation 2020 Faculty of Medicine Scholarship of University of Ottawa.

364

365



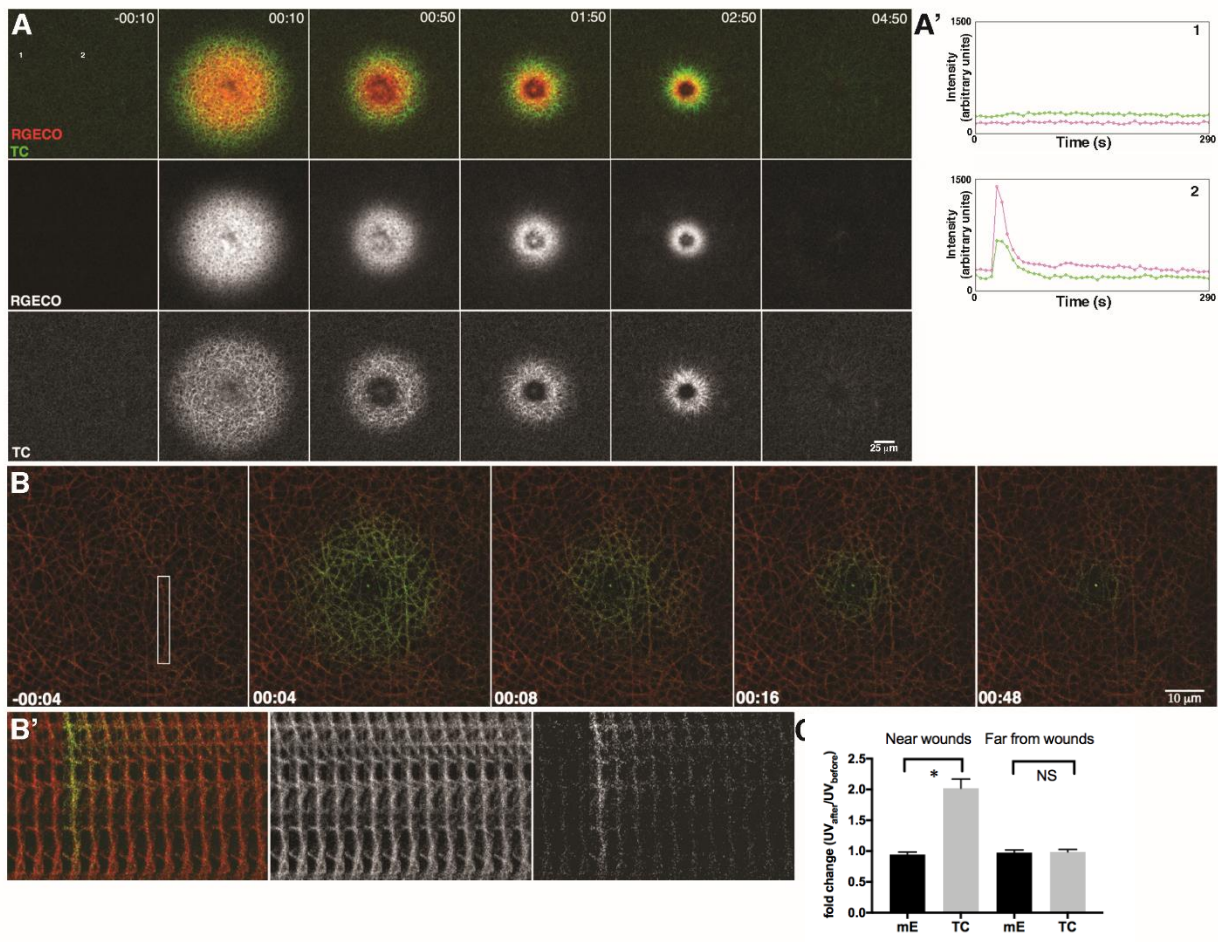

Figure 1

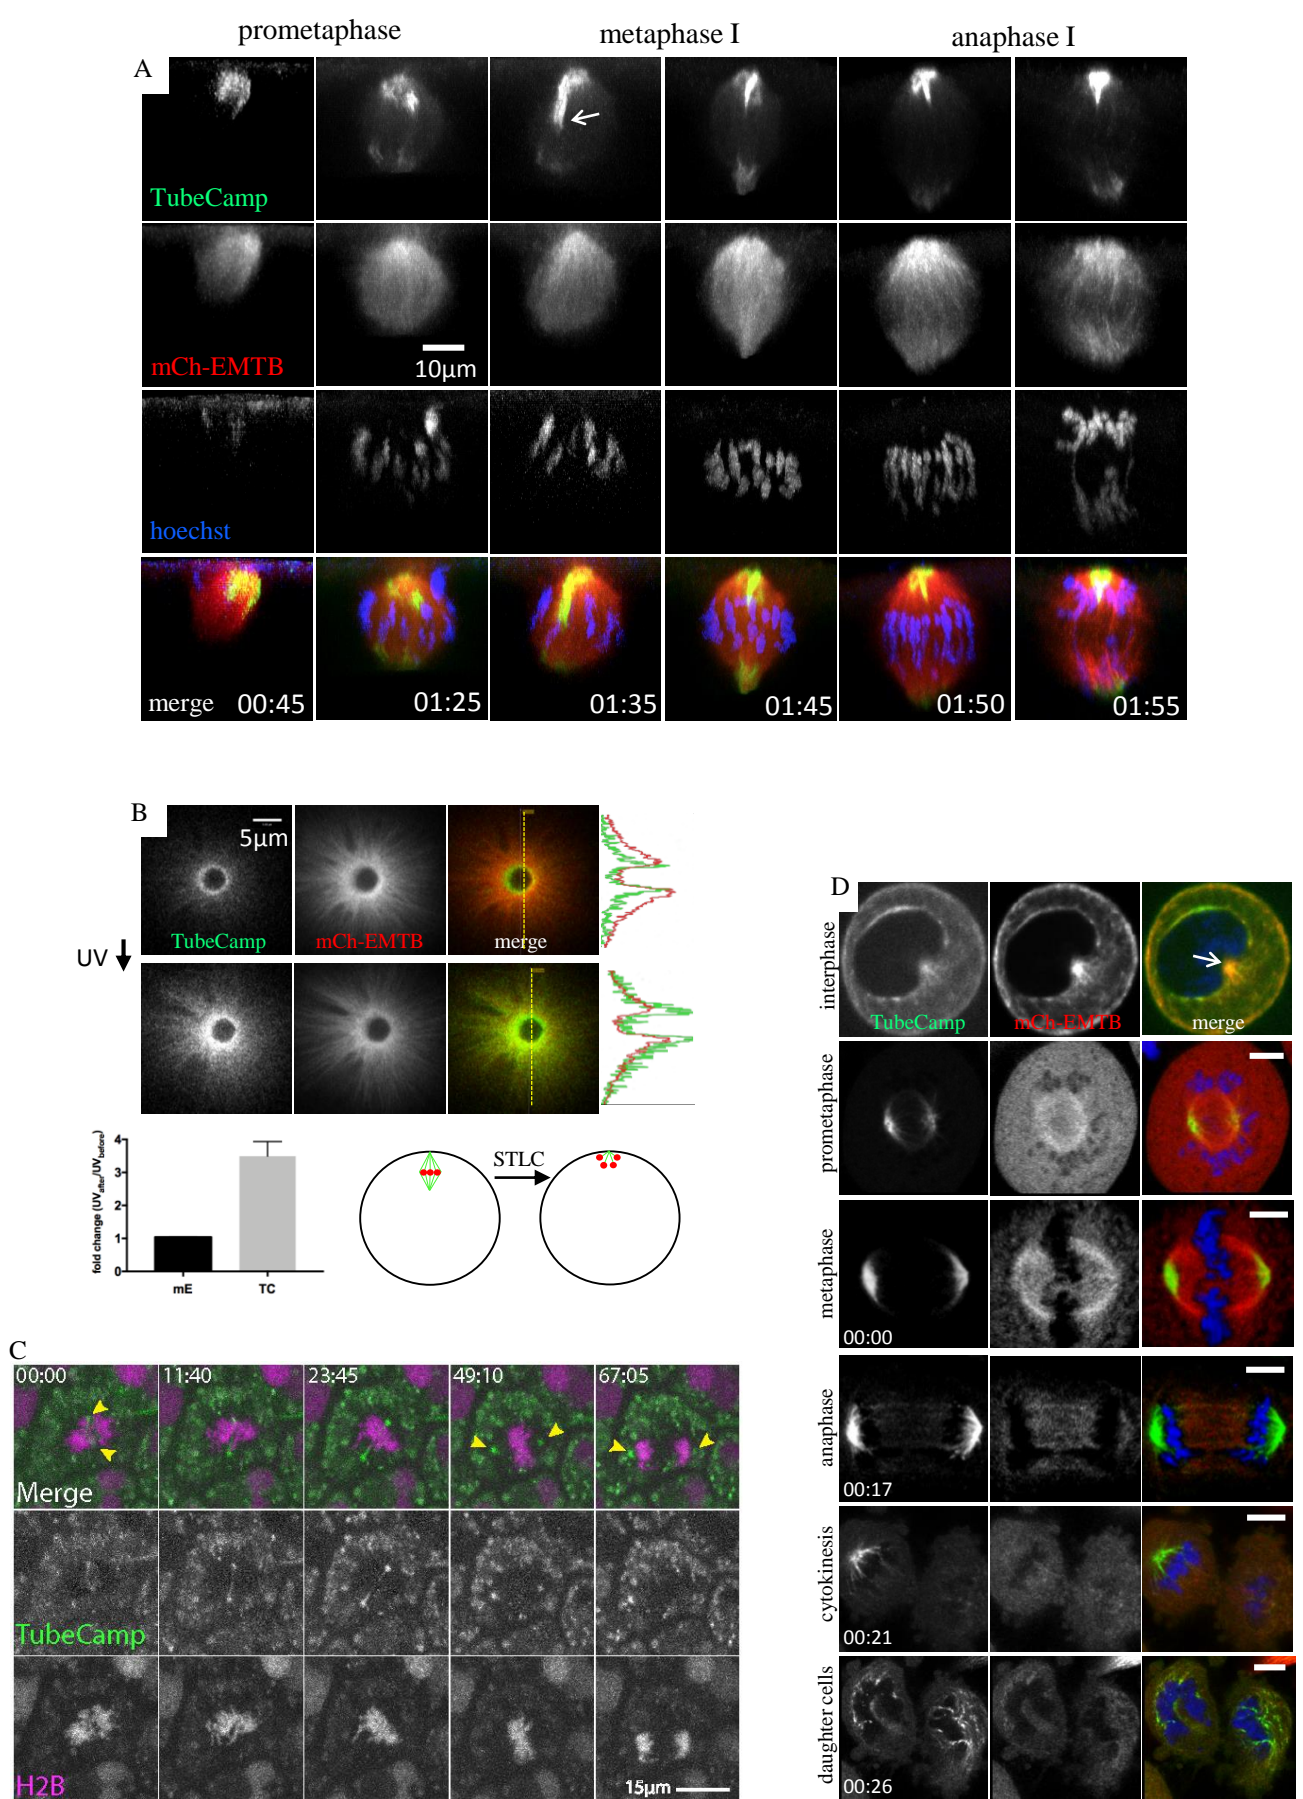

Figure 2

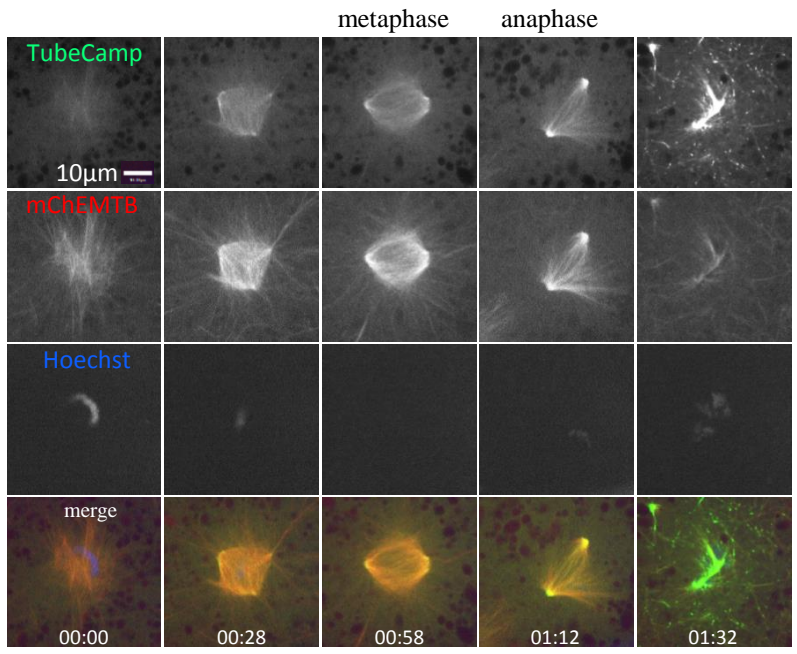

Figure 3

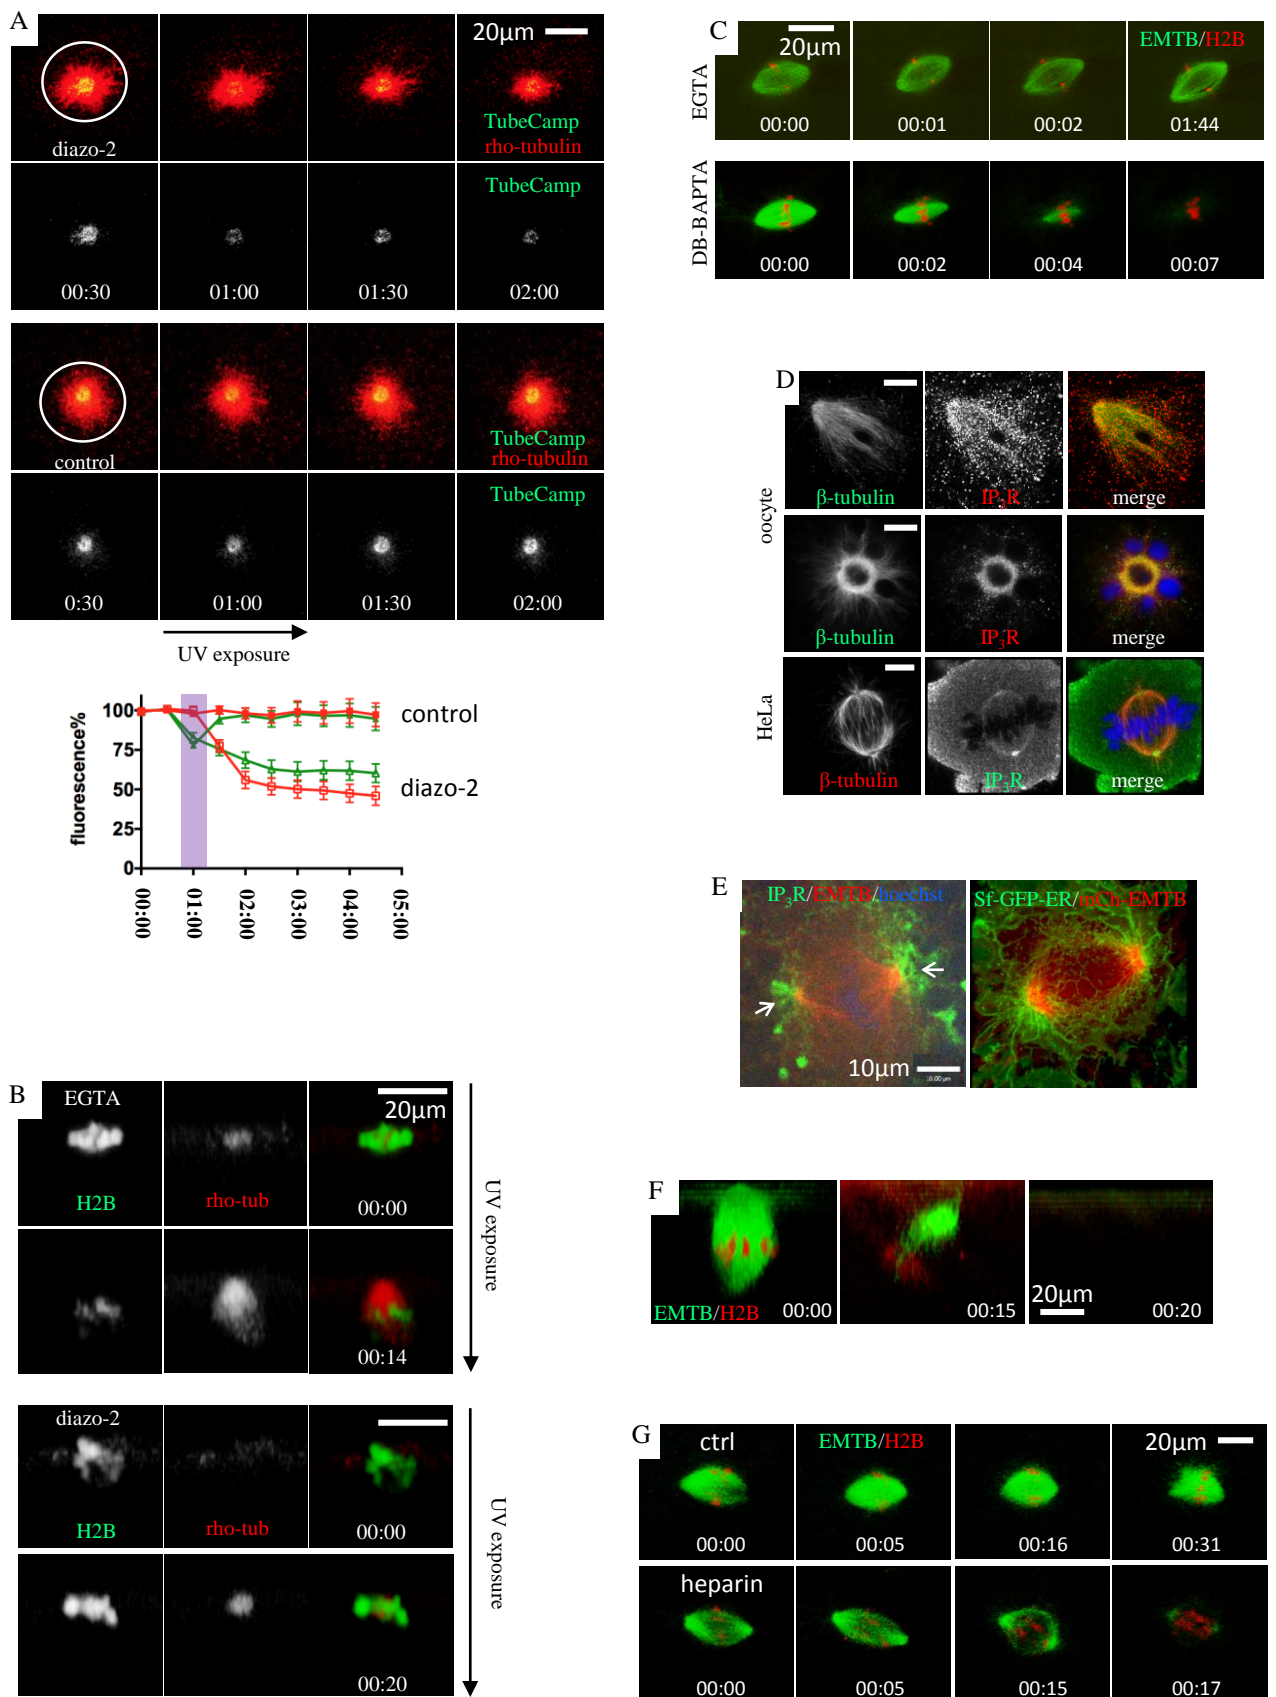

Figure 4

366 **Methods**

367

368 Rabbit polyclonal antibodies against IP<sub>3</sub> receptor-1(H-80) are from Santa Cruz. Mouse

369 monoclonal antibodies against IP<sub>3</sub> receptors, 4C11, have been described<sup>24</sup>. H-80 was

370 combined with monoclonal anti-tubulin β (DM1B, ICN)<sup>25</sup> for oocyte immune-staining.

371 4C11 was combined with rabbit anti-tubulin β (Santa Cruz) for HeLa cell immune-

372 staining. We used the MaxChelator program

373 (<https://web.stanford.edu/~cpatton/maxc.html>) to calculate the ratio of Ca<sup>2+</sup> buffers over

374 CaCl<sub>2</sub> (EGTA:CaCl<sub>2</sub>=4:1; dibromo-BAPTA:CaCl<sub>2</sub>=10:1) to give the desired free Ca<sup>2+</sup>

375 concentration, ~140nM<sup>19</sup>, in the calcium buffers used in extract spindle experiments.

376

377 Construction of plasmid for TubeCamp

378

379 First, the entire GCaMP3 coding sequence (Addgene #22692) was excised using Bgl II

380 and Not I. The fragment was treated with Klenow before being inserted into the Stu I site

381 of pCS2+ vector<sup>26</sup>, resulting the expression plasmid pCS2-GCaMP3<sup>10</sup>. To generate

382 TubeCamp, we PCR-amplified the sequence coding for the microtubule-binding domain

383 of E-MAP115, EMTB<sup>14</sup>, using the following two primers (5' and 3' respectively):

384 5'-TATGAATTCACCATGGCAGTGCGAAGCGAAACA and

385 5'-TATGAATTCGAAGAGCCCTCAGGTGG. The amplified DNA was digested with

386 EcoRI followed by being inserted into the EcoRI site of pCS2+GCaMP3, described

387 above<sup>10</sup>. The resulting plasmid, TubeCamp, expresses EMTB at the N-terminus followed

388 by the original GCaMP3 coding sequence including its N-terminal poly-His tag<sup>11</sup>. These

389 cloning manipulations also created a seven amino acids insert (NSRDLAT) between  
390 EMTB and the initiating methionine of GCaMP3. The plasmid was linearized with Not I  
391 and transcribed in vitro using SP6 polymerase (Ambion kit).

392

### 393 Oocyte isolation and injection

394

395 Oocytes were manually defolliculated<sup>27</sup> and were kept at 18 °C in OCM medium (oocyte  
396 culture medium: 60% of L-15 medium (Sigma), supplemented with 1.07 g BSA per liter,  
397 mixed with 40% autoclaved water to yield the appropriate isotonic solution for amphibian  
398 oocytes). Manually defolliculated oocytes were used for all live cell imaging and  
399 cytoplasmic droplet experiments without further treatment. When oocytes were used for  
400 immunofluorescence experiments (Fig. 3A), manually defolliculated oocytes were treated  
401 briefly with collagenase<sup>27</sup> to remove residual follicle cells<sup>28</sup> before use.

402

403 Manually defolliculated oocytes were injected with mRNA encoding various probes, as  
404 described in our previous publications<sup>29-31</sup>. For plasmid DNA, we usually injected 1-3 nL  
405 of highly purified plasmid DNA dissolved in water (~1mg/mL) into the germinal vesicle,  
406 which is located directly under the animal pole, measuring about 0.5mm in diameter<sup>27</sup>.  
407 The injected oocytes were incubated in OCM for at least 6 hours (mRNA), or up to 2-3  
408 days, before the addition of progesterone (1µM) to induce oocyte maturation.

409

### 410 Live imaging and image analyses

411

412 Oocytes were monitored for GVBD (germinal vesicle breakdown, indicated by the  
413 appearance of a white maturation spot) every 10 min. GVBD oocytes were individually  
414 transferred to fresh OCM without progesterone and further incubated, until the time of  
415 fluorescence imaging or cytoplasm aspiration for in vitro spindle assembly (see later).  
416  
417 Oocytes were imaged in poly-lysine-coated glass bottom microwell dishes (MatTek  
418 Corporation, P35G-1.5-10-C) with a 60x oil objective on a Zeiss Axiovert with a BioRad  
419 1024 laser scanning confocal imaging system<sup>30</sup>, or a Quorum Spinning Disk confocal  
420 system. Time lapse image series were collected at various time intervals. Each time point  
421 volume was comprised of 15-30 image planes 1-3  $\mu\text{m}$  apart. Image series were 3D-  
422 rendered using Volocity (version 6.3). Fluorescence quantification and co-localization  
423 analyses were performed using Volocity program. All time-series are made from images  
424 acquired from the same cell, unless otherwise indicated.  
425  
426 For super-resolution (LSM880 with AiryScan, Zeiss) imaging, cells were similarly  
427 imaged using a 60 x oil objective. Images were typically acquired in super-resolution x  
428 and y dimensions (40 x 40 nm) but much bigger z steps (0.5-1  $\mu\text{m}$ ). Super-resolution  
429 confocal z-stack acquisition in intact oocytes took an average of 5 min for each time  
430 point. Therefore it is not practical to acquire a complete series during oocyte maturation  
431 or mitotic cell cycle, due to the significant fluorescence photo-bleaching and possible  
432 photo-induced cell cycle disruption. Snapshot images or short time series during critical  
433 transition were typically employed. Images were processed using the ZEN 2.3 Lite  
434 program provided by Carl Zeiss.

435

436 For UV photolysis (on the MRC 1024 system), the oocyte animal pole was exposed to  
437 UV excitation (Chroma's 11000V3, 350/50 nm; 100W mercury bulb) through the same  
438 60x oil objective, and simultaneously subjected to confocal imaging<sup>15</sup>. UV exposure time  
439 was controlled by an electronic shutter (LAMBDA SC, Sutter Instrument) using  
440 manufacturer's program.

441

#### 442 Single cell extract spindle assays

443

444 All operations were performed in the glass bottom microwell dishes and covered with  
445 mineral oil. Demembrated sperm nuclei (500 nuclei/ $\mu$ L)<sup>32,33</sup> were placed at the glass  
446 bottom of the dish in droplets ~5 nL. In some experiments, Hoechst dye was added to  
447 sperm to a final concentration of 1  $\mu$ g per mL before application to the glass. Oocytes,  
448 typically at the time of GVBD or MII, were placed under oil in the same dish with their  
449 animal pole facing up. A glass pipette attached to the microinjector and with a tip-  
450 opening of ~30  $\mu$ m was then forced into the oocyte from the animal hemisphere.

451 Negative pressure ("fill" function) was applied to slowly aspirate oocyte cytoplasm into  
452 the glass pipette (up to 300nL) followed by expelling the cytoplasm onto the sperm  
453 droplets using the "inject" function. Multiple cytoplasmic droplets, 50-100 nL, could be  
454 produced from one oocyte. The dish was then placed on the microscope for confocal  
455 imaging. When chemical inhibitors were used, they were delivered, via an on-stage  
456 microinjector, on top of the cytoplasmic droplet, furthest away from the spindle being



457 imaged (which was at the bottom in our inverse microscope system). The inhibitors were  
458 delivered in volume less than 1/10 of the cytoplasmic droplet.

459

#### 460 HeLa cell methods

461

462 HeLa cells were transfected via Lipofectomine (ThermoFisher) according to  
463 manufacturer's instruction. Transfection was carried out on poly-lysine-coated glass  
464 bottom dishes using the following components (per 3cm dish): 0.25 $\mu$ g of mCh-EMTB  
465 and 0.13 $\mu$ g of TubeCamp, 4 $\mu$ L of Lipofectamine, 2mL of OptiMEM medium plus 5%  
466 fetal bovine serum (FBS). The cells (~90% confluent) were incubated in the transfection  
467 mixture for 6 hours followed by change into fresh  $\alpha$ -MEM medium plus 5% FBS.

468 Transfected cells were imaged either directly in the transfection dishes the next day, or  
469 were split into new glass bottom dishes and imaged in subsequent days. Prior to imaging,  
470 Hoechst dye was added to 1 $\mu$ g/mL to the cells for 5 minutes before changes into dye-free  
471 medium.

472

#### 473 Imaging *Xenopus* embryos expressing TubeCamp

474

475 Albino *Xenopus* eggs were obtained, fertilized, and de-jellied as described previously<sup>18</sup>.  
476 Fertilized embryos were injected at the one cell stage with 16nl of a mixture containing  
477 4ng/ $\mu$ l of mCherry-H2B mRNA and 20ng/ $\mu$ l of TubeCamp mRNA. Embryos were  
478 cultured for 3 days at 14°C before imaging. *Xenopus* embryo images were acquired on an  
479 Opterra Swept Field Confocal (Bruker) equipped with a 60x 1.4NA oil objective using a

480 60 $\mu$ m pinhole array and an Evolve Delta EM-CCD camera (photometrics). Because  
481 images were acquired using a multispectral filter set, bleed-through from the mCherry  
482 signal into the TubeCamp channel was corrected by subtracting 25% of each mCherry  
483 frame from each corresponding TubeCamp frame using FIJI (ImageJ). Both channels  
484 were registered for drift using the StackReg plugin in FIJI, and both channels were  
485 corrected for bleaching using the simple ratio adjustment in FIJI.

486

487 Statistics

488

489 Data were analyzed using Student's t-test (two tailed).

490

491

492 Supplemental Figure 1. TubeCamp detects calcium increase in embryo epithelia

493

494 TubeCamp reports on microtubule-proximal changes in  $[Ca^{2+}]_i$  in intact epithelium. Still  
495 frames from confocal movie of wounded *Xenopus* gastrula epidermis expressing  
496 TubeCamp. Time in min:sec; cell indicated by arrow wounded at 0 sec. Prior to  
497 wounding signal is largely confined to microtubules at presumptive base of the cilia in  
498 apical domain; wounding results in transient highlighting of entire microtubule  
499 cytoskeleton in cells neighboring the wounded cell.

500

501 Supplementary Figure 2. TubeCamp responds to fertilization calcium wave

502

503 Metaphase II oocytes expressing TubeCamp and RFP-H2B before (left) and 3 minutes  
504 after (right) pricking to induce fertilization-specific calcium wave. TubeCamp signal  
505 dramatically increased after pricking. 1<sup>st</sup> pb: first polar body.

506

507 Supplementary Figure 3. Calcium transients at the spindle assembly site

508

509 Confocal time series of an oocyte injected with Oregon-green BAPTA-2 (OG-2) and  
510 RFP-H2B at the indicated stage. Time (hr:min) is relative to the start of live cell imaging  
511 (00:00). Specific  $Ca^{2+}$  increase was seen only at the spindle assembly site, not elsewhere  
512 in the entire oocyte cortex. pb: first polar body (Movie 1).

513

514 Supplementary Figure 4. Calcium signal associated with mitotic spindles

515

516 A typical metaphase HeLa cell expressing TubeCamp and mCh- $\alpha$ -tubulin in the presence  
517 of Hoechst dye (blue). Left-to-right in line scan corresponds to left-to-right on the image.

518

519 Supplementary Figure 5. Spindle assembly in single cell aspirates

520

521 Time series of spindle formation around a single demembrated sperm in micro-aspirate  
522 derived from a single *Xenopus* oocyte. (Multiple droplets can be obtained from a single  
523 oocyte.) The oocyte was injected with RFP-H2B and eGFP-EMTB mRNAs and  
524 stimulated with progesterone. Cytoplasm was aspirated at the time of germinal vesicle  
525 breakdown (GVBD), mixed with demembrated sperm nuclei (00:00), and subjected to  
526 time lapse imaging. An aster formed shortly at one end of the sperm (00:07). Metaphase  
527 to anaphase transition was evident with the stretching followed by disappearance of  
528 microtubules. No chromosome segregation occurred because of the chromosomes are  
529 haploid (single sisters). Often the chromosomes moved away from the surface of the  
530 droplet after anaphase, beyond the detection limit of our confocal systems. Unlike in  
531 intact oocytes which form a metaphase II spindle after meiosis I, we have not seen any of  
532 our GVBD extracts formed a second spindle after anaphase.

533

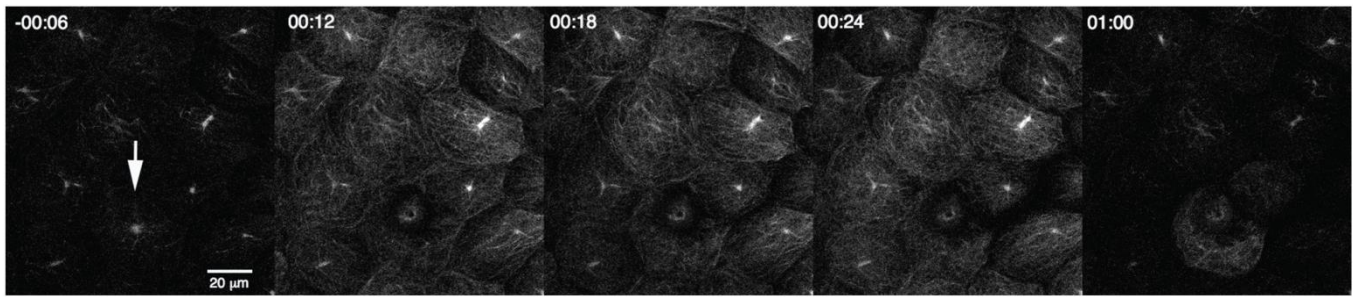

Supp. Fig. 1

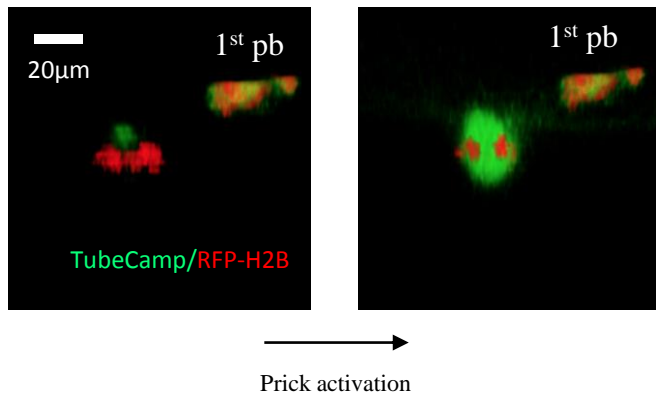

Supp. Fig. 2

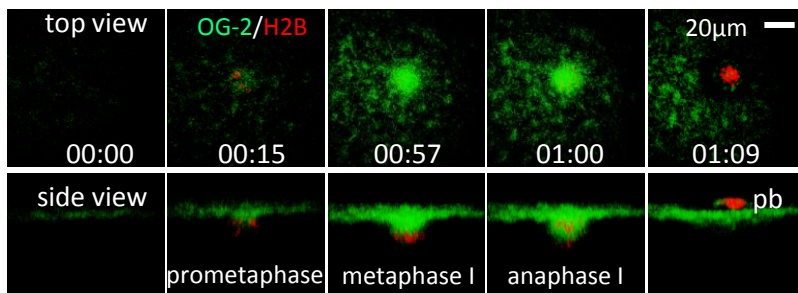

Supp. Fig. 3

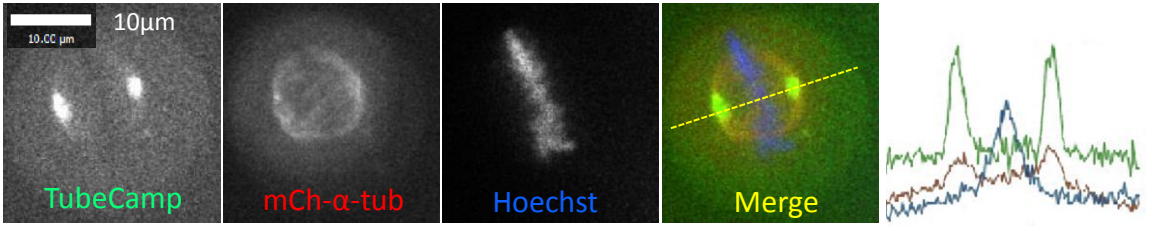

Supp. Fig. 4



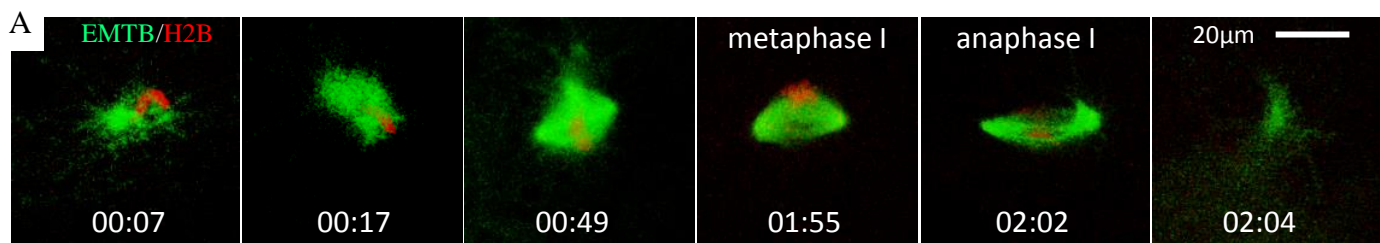

Source: https://www.biorxiv.org/content/biorxiv/early/2018/08/30/404715.full.pdf
